# Supplementary material
Source: PubMed Central journal article supplement (PMC3458636)
Supplement: Supp_Fig1.pdf [file Supp_Fig1.pdf]

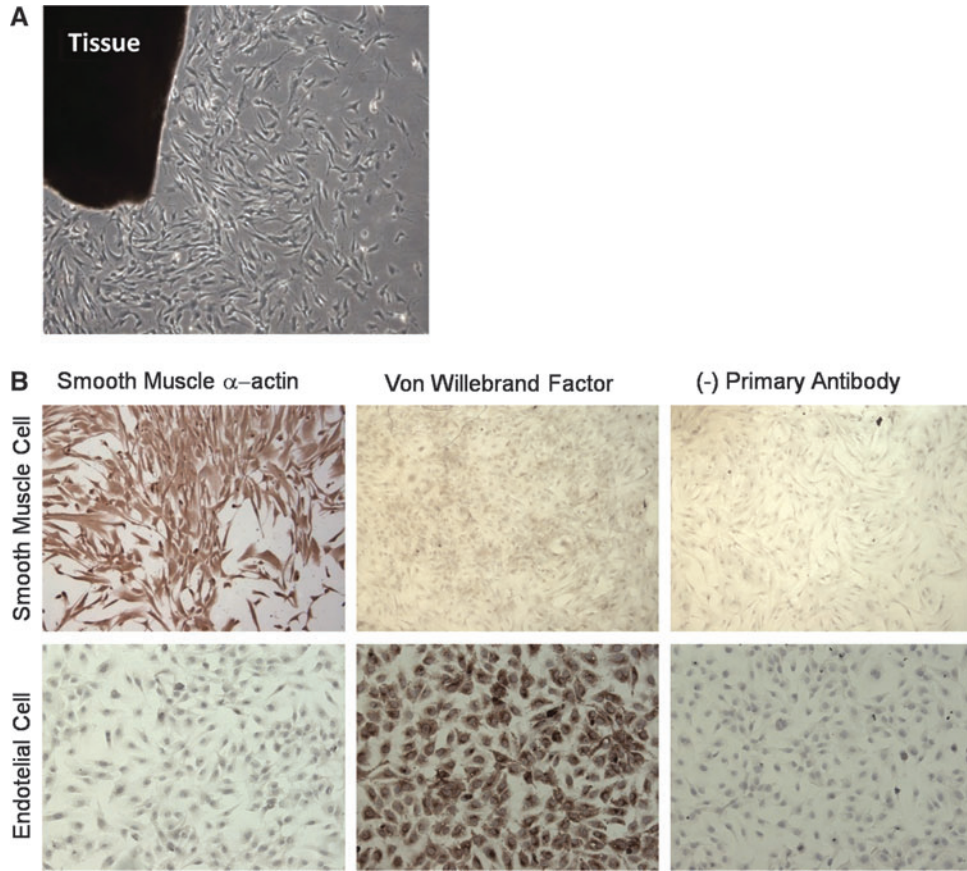

**SUPPLEMENTARY FIG. S1.** Images of extracted cells: **(A)** Smooth muscle cells (SMCs) were followed via light microscopy and passaged when they reached 70%–80% confluency. **(B)** The SMCs that are extracted via explant technique show  $\alpha$ -actin positivity and Von Willebrand negativity. Endothelial cells are vWF-positive and  $\alpha$ -actin-negative as expected. (SMC: 5 $\times$ , Endothelial cells: 20 $\times$  magnification).
