# Supplementary material
Source: PubMed Central journal article supplement (PMC3458636)
Supplement: Supp_Fig2.pdf [file Supp_Fig2.pdf]

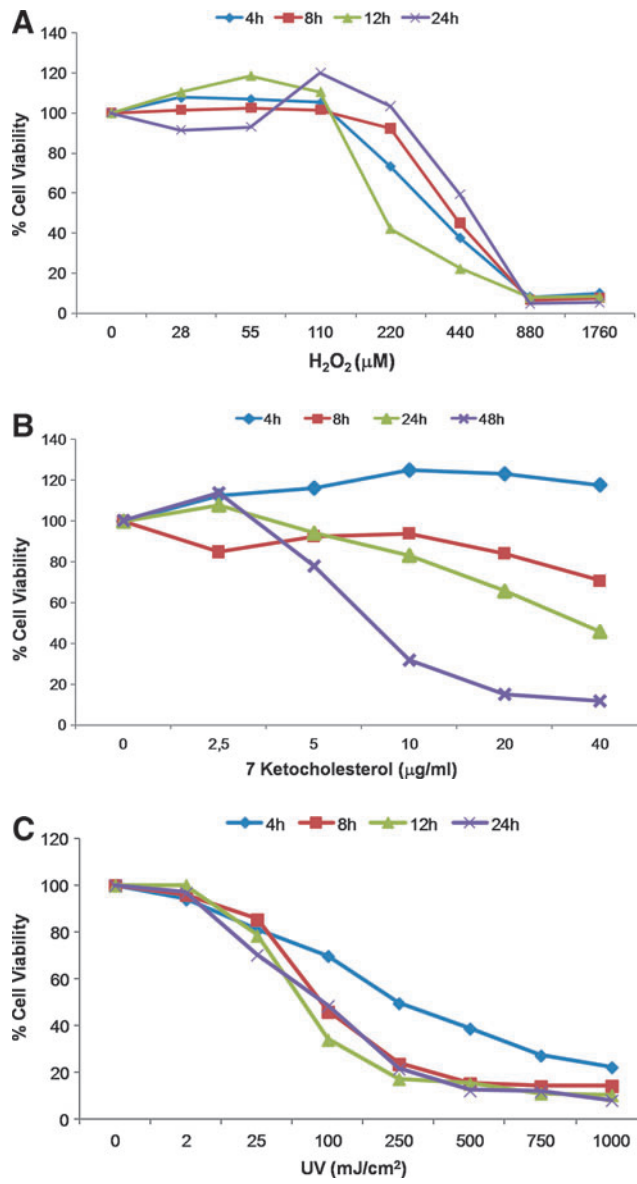

**SUPPLEMENTARY FIG. S2.** Loss of cell viability measured at indicated time points as a result of H<sub>2</sub>O<sub>2</sub> (A), 7-ketocholesterol (B), and UV (C) treatment. An average of triplicate experiments is shown in figure for normal cells versus patient cells. Cell viability is measured with WST-1 reagent (Roche).
