# Supplementary material
Source: PubMed Central journal article supplement (PMC3458636)
Supplement: Supp_Fig3.pdf [file Supp_Fig3.pdf]

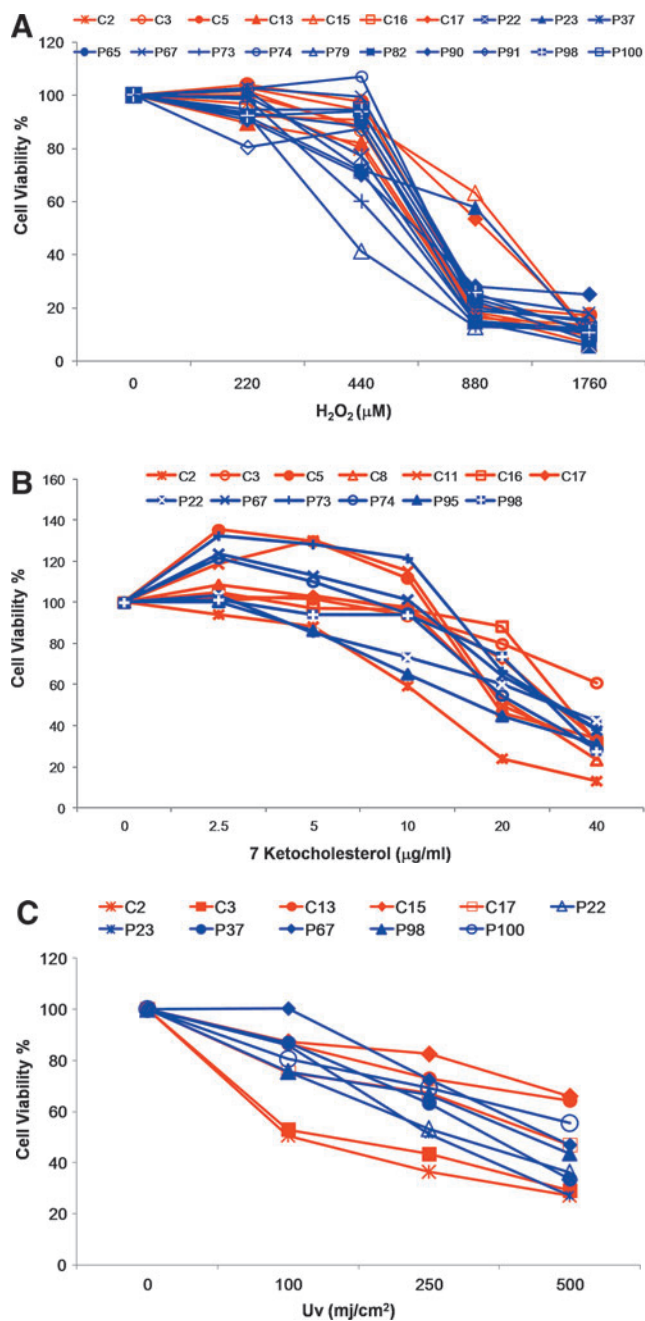

**SUPPLEMENTARY FIG. S3.** Comparison of cell viability profiles of SMCs extracted from different individuals in response to  $H_2O_2$  (A), 7-Ketocholesterol (B), and UV (C) treatment. An average of at least 3 independent experiments (done in triplicate) is shown in the graph. (Identifiers starting with C indicate controls, starting with P indicate the patients.) There is no significant difference in cell viability in response to oxidative stress between patient and control SMCs (Analysis based on Area Under Curve, Mann-Whitney U test,  $p=0.452$  for  $H_2O_2$ ,  $p=0.855$  for UV, and  $p=0.668$  for 7-KC).
