# Supplementary material
Source: PubMed Central journal article supplement (PMC3458636)
Supplement: Supp_Fig4.pdf [file Supp_Fig4.pdf]

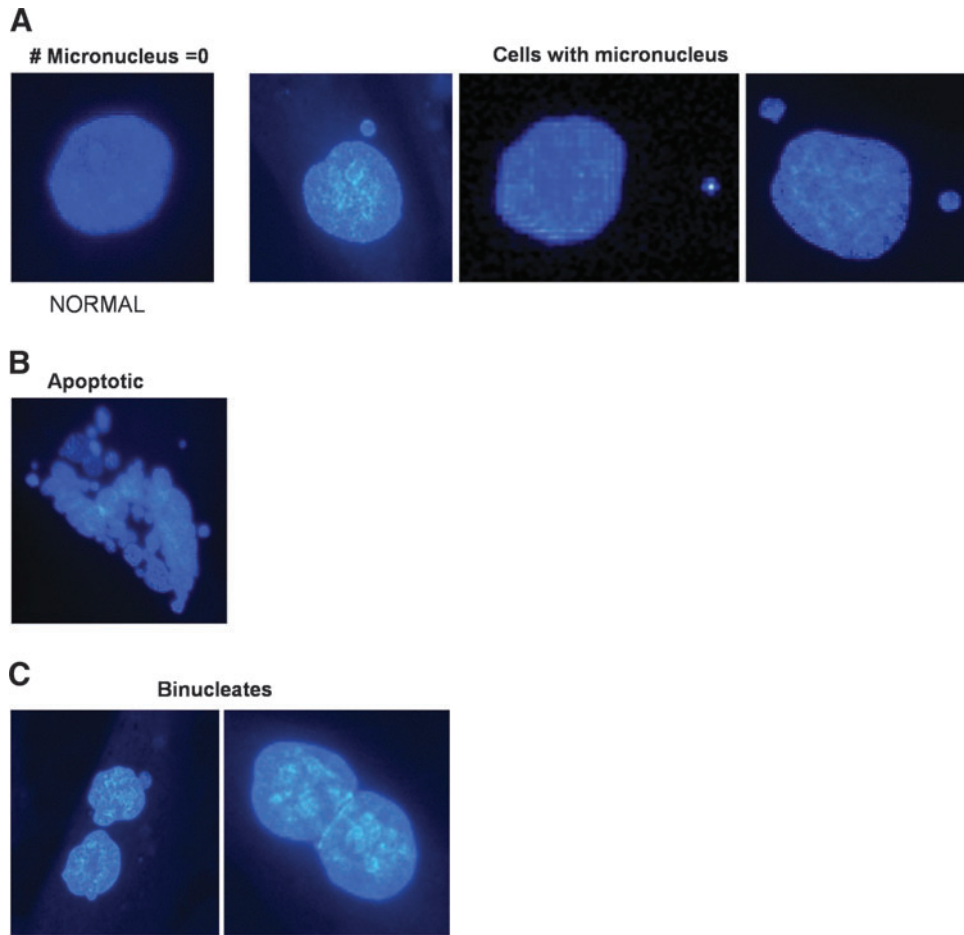

**SUPPLEMENTARY FIG. S4.** Representative images of cells with anomalies and the frequency of these anomalies: **(A)** While there is only one, single, intact nucleus in normal cells (#MN=0), micronucleus of different size and number can also be observed separate from the main nucleus in cells that are exposed to genotoxic stress. **(B)** Examples of apoptotic (spontaneous) and **(C)** binucleate cells scored in this study. **(D)** Different patients exhibit different levels of genomic anomalies as determined by %MN and BN%. The level of apoptosis is close to 0% in most patient and control cells.

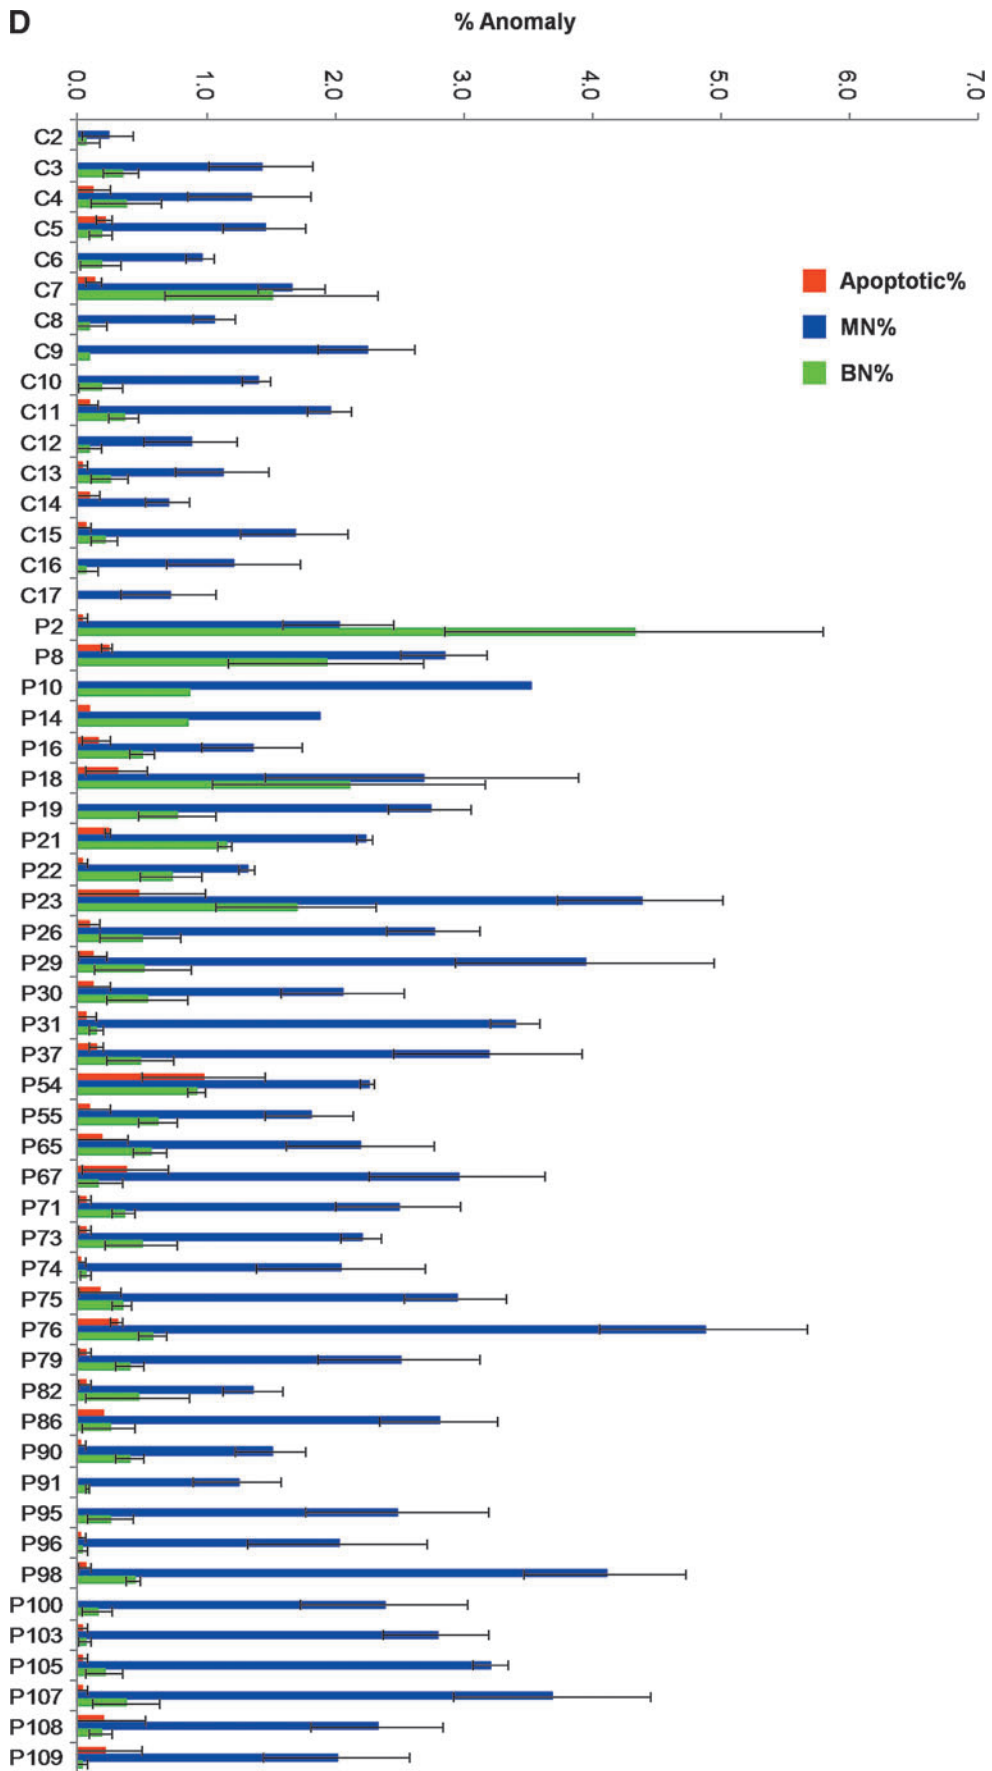

SUPPLEMENTARY FIG. S4. (Continued).
