# Supplementary material
Source: PubMed Central journal article supplement (PMC3458636)
Supplement: Supp_Table.pdf [file Supp_Table.pdf]

SUPPLEMENTARY TABLE S1. DETAILED INFORMATION  
ON THE ORIGINS OF CONTROL CELL SAMPLES  
USED IN THIS STUDY

---

| Commercial | Organ<br>Acceptor | Organ<br>Donor | By-pass<br>Surgery |
|------------|-------------------|----------------|--------------------|
| CONTROL1   | CONTROL5          | CONTROL3       | CONTROL8           |
| CONTROL2   | CONTROL6          | CONTROL7       | CONTROL9           |
| CONTROL4   | CONTROL17         | CONTROL15      | CONTROL10          |
|            |                   |                | CONTROL11          |
|            |                   |                | CONTROL12          |
|            |                   |                | CONTROL13          |
|            |                   |                | CONTROL14          |
|            |                   |                | CONTROL16          |

---

The numbers are the same as indicated in the figures. All control cells were obtained from the thoracic origin of the aorta.
